# Supplementary material for: Auditory Processing and Stuttering: Preliminary data
Source: Research Square preprint supplement (doi:10.21203/rs.3.rs-7526955/v1), 2025-11-04
Supplement: Supplementary file 1 [file 21643b087481fdf6871bbc9c.docx]

**Appendix A. Age related norms**

| Age | Examined  Ear | SinB Words  (50% SNR) | GIN  (ms) | DD  (%) |
| --- | --- | --- | --- | --- |
| 7 years | Right  Left | ≤1.3  ≤1.3 | 8ms  8ms | >60%  >50% |
| 8 years | Right  Left | ≤1.3  ≤1.3 | 8ms  8ms | >70%  >65% |
| 9 years | Right  Left | ≤1.3  ≤1.3 | 8ms  8ms | >80%  >75% |
| 10 years | Right  Left | ≤1.3  ≤1.3 | 8ms  8ms | >85%  >75% |
| 11 years | Right  Left | ≤1.3  ≤1.3 | 8ms  8ms | >85%  >85% |
| 12 years | Right  Left | ≤1.3  ≤1.3 | 8ms  8ms | >85%  >85% |

Note: SinB, Speech in Babble; GIN, Gaps in Noise; DD, Dichotic Digits; 50% SNR, SNR threshold at which the 50% of the items are correctly identified; ms, milliseconds
